# Supplementary material
Source: publisher figshare collection journal article supplement (https://geolsoc.figshare.com/ndownloader/files/16214489)
Supplement: Supplementary file 1 [file 16214489]

Well ID	Depth (m)	Sample ID	Grain ID	206Pb/204Pb	2s	207Pb/204Pb	2s	208Pb/204Pb	2s
18/20-2z	3488.9	8	F1	15.7841	0.023	15.2754	0.0222	35.184	0.0516
18/20-2z	3488.9	8	F11	15.7365	0.015	15.2574	0.0146	35.2093	0.0337
18/20-2z	3488.9	8	F12	15.3025	0.1398	14.9837	0.1364	34.7154	0.3066
18/20-2z	3488.9	8	F14	15.461	0.0519	15.153	0.051	34.9607	0.1191
18/20-2z	3488.9	8	F17	15.3026	0.133	15.0872	0.1274	35.1861	0.3225
18/20-2z	3488.9	8	F2	14.1266	0.0504	14.7622	0.0527	35.5851	0.1298
18/20-2z	3488.9	8	F20	15.9975	0.0905	15.2088	0.0834	35.0308	0.1926
18/20-2z	3488.9	8	F23	15.8259	0.0198	15.2898	0.0193	35.2811	0.0451
18/20-2z	3488.9	8	F24	16.0317	0.0867	15.3214	0.0837	35.3642	0.1937
18/20-2z	3488.9	8	F25	17.9047	0.0401	15.5489	0.0353	37.8512	0.0862
18/20-2z	3488.9	8	F26	15.1289	0.037	15.0947	0.0372	34.7403	0.0862
18/20-2z	3488.9	8	F27	14.2451	0.1517	14.8728	0.1567	34.4268	0.37
18/20-2z	3488.9	8	F28	15.6903	0.1491	15.1697	0.1464	35.0847	0.3393
18/20-2z	3488.9	8	F29	15.7625	0.0476	15.2708	0.0466	35.4076	0.1087
18/20-2z	3488.9	8	F3	14.1747	0.0244	14.7876	0.0257	34.0466	0.0586
18/20-2z	3488.9	8	F30	15.8549	0.0337	15.3081	0.0327	35.2946	0.0757
18/20-2z	3488.9	8	F31	15.646	0.0367	15.1915	0.0359	35.0388	0.0835
18/20-2z	3488.9	8	F32	15.7494	0.1118	15.2946	0.1095	35.2592	0.2545
18/20-2z	3488.9	8	F33	14.075	0.0667	14.6346	0.0469	35.797	0.3235
18/20-2z	3488.9	8	F35	15.4183	0.1063	15.0634	0.1051	34.7124	0.2451
18/20-2z	3488.9	8	F37	14.3118	0.0923	14.8465	0.0962	34.2394	0.2225
18/20-2z	3488.9	8	F38	15.7077	0.1203	15.3064	0.1179	35.2787	0.2739
18/20-2z	3488.9	8	F39	16.0628	0.105	15.1963	0.0885	35.3429	0.2066
18/20-2z	3488.9	8	F4	14.1	0.0296	14.7442	0.0307	33.9103	0.0719
18/20-2z	3488.9	8	F40	16.7666	0.0423	15.291	0.0388	36.1643	0.0924
18/20-2z	3488.9	8	F41	14.9611	0.0385	15.0505	0.0388	34.7729	0.0924
18/20-2z	3488.9	8	F42	14.0367	0.0263	14.7284	0.0274	33.8092	0.0637
18/20-2z	3488.9	8	F43	14.4738	0.056	14.8085	0.0552	34.2356	0.1297
18/20-2z	3488.9	8	F44	14.7124	0.1861	14.9443	0.1909	34.4081	0.4457
18/20-2z	3488.9	8	F46	17.1158	0.1414	15.4141	0.0768	35.5883	0.1824
18/20-2z	3488.9	8	F47	14.1007	0.0234	14.7688	0.0244	33.9356	0.0569
18/20-2z	3488.9	8	F50	15.744	0.0403	15.2781	0.0392	35.2578	0.0908
18/20-2z	3488.9	8	F53	15.7036	0.1427	15.2055	0.1383	35.0962	0.3239
18/20-2z	3488.9	8	F59	15.72	0.0258	15.2126	0.0247	35.0797	0.0581
18/20-2z	3488.9	8	F60	15.1084	0.1665	15.0878	0.1667	34.7604	0.3878
18/20-2z	3488.9	8	F61	14.0623	0.0516	14.7246	0.0542	33.928	0.126
18/20-2z	3488.9	8	F62	15.7574	0.0243	15.249	0.024	35.1579	0.0558
18/20-2z	3488.9	8	F64	14.5079	0.0437	14.8643	0.0449	34.2025	0.1046
18/20-2z	3488.9	8	F66	22.1911	0.1081	16.1003	0.0417	34.6826	0.0865
18/20-2z	3488.9	8	F67	14.2822	0.0193	14.8049	0.0199	34.1792	0.0463
18/20-2z	3488.9	8	F68	18.9302	0.0324	22.7589	0.0341	60.2809	0.0798
18/20-2z	3488.9	8	F8	14.6985	0.0508	14.9862	0.0514	34.6727	0.1209
18/20-2z	3488.9	8	F9	17.3623	0.0388	15.5048	0.0347	36.8338	0.0837
18/20-2z	3468	13	F10	18.8412	0.0143	15.6577	0.0087	38.3135	0.0229
18/20-2z	3468	13	F11	19.0592	0.0753	15.5972	0.0321	39.6575	0.1284
18/20-2z	3468	13	F12	15.8988	0.0156	15.3129	0.0132	35.3702	0.0322
18/20-2z	3468	13	F15	14.687	0.0122	14.8775	0.0125	34.6926	0.029
18/20-2z	3468	13	F16	15.9673	0.0639	15.1836	0.0304	35.4114	0.0769
18/20-2z	3468	13	F17	14.6188	0.0262	14.9067	0.0264	34.4419	0.0612
18/20-2z	3468	13	F19	15.9727	0.0563	15.2007	0.0499	35.4127	0.123
18/20-2z	3468	13	F20	14.2236	0.0951	14.8543	0.0975	34.5388	0.2312
18/20-2z	3468	13	F21	14.94	0.1823	15.1939	0.1805	35.2948	0.4313
18/20-2z	3468	13	F22	14.6639	0.1006	15.0282	0.0958	34.9053	0.2374
18/20-2z	3468	13	F23	15.1299	0.1462	15.0928	0.1333	35.7733	0.3291
18/20-2z	3468	13	F24	16.1676	0.1306	15.3218	0.1044	35.7017	0.266
18/20-2z	3468	13	F25	16.3746	0.0358	15.3467	0.0273	36.0418	0.0681
18/20-2z	3468	13	F26	14.1082	0.0233	14.8038	0.0217	33.6982	0.051
18/20-2z	3468	13	F27	15.089	0.0453	15.0566	0.0459	34.8061	0.1059
18/20-2z	3468	13	F28	19.806	0.1132	15.777	0.0792	36.8484	0.2113
18/20-2z	3468	13	F29	17.0646	0.0271	15.4879	0.0247	36.8072	0.0588
18/20-2z	3468	13	F31	14.4461	0.0631	14.7681	0.0418	34.4736	0.1049
18/20-2z	3468	13	F32	14.3225	0.115	14.7921	0.1192	34.4755	0.2813
18/20-2z	3468	13	F33	18.3116	0.0752	15.6097	0.0579	37.8936	0.147
18/20-2z	3468	13	F34	14.4659	0.0495	14.8028	0.0465	34.4485	0.1091
18/20-2z	3468	13	F36	15.3076	0.0226	15.0001	0.0198	34.8698	0.047
18/20-2z	3468	13	F37	15.0901	0.0099	14.9584	0.0097	36.2341	0.0235
18/20-2z	3468	13	F38	14.8304	0.1019	14.9627	0.0986	34.6781	0.2347
18/20-2z	3468	13	F39	15.3199	0.0214	15.1138	0.0213	34.8736	0.0489
18/20-2z	3468	13	F4	15.983	0.043	15.3097	0.0405	35.4516	0.095
18/20-2z	3468	13	F40	14.0152	0.0165	14.7862	0.0165	33.9482	0.0388
18/20-2z	3468	13	F41	14.864	0.1179	14.7871	0.1134	34.4378	0.2647
18/20-2z	3468	13	F42	15.8632	0.0992	15.1256	0.0849	35.5345	0.2103
18/20-2z	3468	13	F45	14.5274	0.033	14.7015	0.0318	33.7454	0.073
18/20-2z	3468	13	F46	14.8779	0.0441	15.0063	0.0336	34.8169	0.084
18/20-2z	3468	13	F5	17.4856	0.0696	15.4686	0.0367	37.2002	0.1108
18/20-2z	3468	13	F50	15.3428	0.0295	15.1421	0.0294	34.6875	0.0674
18/20-2z	3468	13	F52	15.4058	0.0219	15.1222	0.0213	34.9213	0.0495
18/20-2z	3468	13	F54	15.6539	0.0214	15.2341	0.0208	35.2803	0.0484
18/20-2z	3468	13	F56	15.4532	0.0269	15.1137	0.0258	34.8171	0.0596
18/20-2z	3468	13	F58	14.0899	0.0423	14.8123	0.0445	34.0727	0.1032
18/20-2z	3468	13	F59	14.363	0.1014	14.9747	0.1069	34.5887	0.2487
18/20-2z	3468	13	F60	13.8609	0.0143	14.7031	0.0148	34.1436	0.0348
18/20-2z	3468	13	F62	14.6007	0.0585	14.8902	0.0478	35.5	0.1148
18/20-2z	3468	13	F64	15.7863	0.0276	15.2268	0.0228	35.1019	0.0517
18/20-2z	3468	13	F7	14.9225	0.0158	15.0073	0.0149	35.386	0.0357
18/20-2z	3468	13	F9	15.0231	0.1764	14.8314	0.1573	36.1704	0.3906
18/20-2z	3462	15	F10	18.0244	0.0272	15.6438	0.0183	35.3672	0.0439
18/20-2z	3462	15	F11	13.4712	0.005	14.6033	0.0055	33.3648	0.0123
18/20-2z	3462	15	F12	14.2246	0.0205	14.7769	0.0188	34.1674	0.0444
18/20-2z	3462	15	F13	14.0298	0.0517	14.7845	0.0487	34.091	0.1157
18/20-2z	3462	15	F14	14.6879	0.028	14.8989	0.0256	34.4843	0.0599
18/20-2z	3462	15	F15	15.196	0.0515	15.1307	0.052	34.9932	0.121
18/20-2z	3462	15	F16	14.2718	0.0063	14.8146	0.0065	34.1408	0.0149
18/20-2z	3462	15	F17	14.329	0.0249	14.7093	0.0254	34.17	0.0599
18/20-2z	3462	15	F18	14.4377	0.0393	14.8545	0.023	34.4437	0.0652
18/20-2z	3462	15	F19	15.1745	0.0167	15.0527	0.0144	34.8332	0.0342
18/20-2z	3462	15	F20	14.3376	0.0139	14.8752	0.0145	34.3855	0.0338
18/20-2z	3462	15	F21	14.3265	0.0608	14.792	0.0626	34.2361	0.1465
18/20-2z	3462	15	F22	16.7724	0.0347	15.2991	0.0236	35.3843	0.0564
18/20-2z	3462	15	F23	14.2012	0.013	14.8213	0.0136	34.2829	0.0318
18/20-2z	3462	15	F24	13.939	0.0067	14.7513	0.0063	33.9065	0.0148
18/20-2z	3462	15	F27	13.5061	0.0113	14.5648	0.0099	33.5967	0.0231
18/20-2z	3462	15	F28	13.9533	0.0254	14.7025	0.0253	34.136	0.0591
18/20-2z	3462	15	F29	14.4442	0.022	14.8558	0.0223	34.3889	0.0522
18/20-2z	3462	15	F3	14.1148	0.0261	14.7878	0.0204	34.2082	0.0483
18/20-2z	3462	15	F30	15.9151	0.1163	15.2944	0.086	35.8022	0.2083
18/20-2z	3462	15	F31	15.1765	0.0772	14.9308	0.0557	34.8245	0.1498
18/20-2z	3462	15	F32	14.7622	0.0687	14.8708	0.0687	34.4483	0.1603
18/20-2z	3462	15	F33	14.5229	0.1259	14.8265	0.1241	34.3247	0.2927
18/20-2z	3462	15	F34	15.7332	0.11	15.1538	0.0937	37.0845	0.2485
18/20-2z	3462	15	F35	13.6671	0.0137	14.7115	0.0115	33.2606	0.0291
18/20-2z	3462	15	F36	13.6035	0.0111	14.3794	0.0099	34.9283	0.0246
18/20-2z	3462	15	F37	18.9788	0.0274	15.925	0.0131	37.3407	0.03
18/20-2z	3462	15	F38	15.4928	0.0676	15.0053	0.0632	34.8451	0.1499
18/20-2z	3462	15	F39	14.8975	0.012	14.7415	0.0095	34.6571	0.0227
18/20-2z	3462	15	F4	15.9935	0.166	15.0885	0.1068	35.6745	0.2723
18/20-2z	3462	15	F40	14.6457	0.0217	14.7569	0.0185	34.1972	0.0427
18/20-2z	3462	15	F41	14.2538	0.0602	14.7862	0.0543	34.0699	0.1306
18/20-2z	3462	15	F42	14.0728	0.0226	14.6681	0.0183	34.7152	0.0438
18/20-2z	3462	15	F43	14.3055	0.0494	14.7538	0.0507	34.122	0.119
18/20-2z	3462	15	F45	15.4803	0.0254	15.0683	0.0244	34.8467	0.0574
18/20-2z	3462	15	F46	15.7398	0.0102	15.1898	0.0081	35.0755	0.0193
18/20-2z	3462	15	F47	15.5305	0.0495	15.0538	0.0472	35.9737	0.114
18/20-2z	3462	15	F49	15.4992	0.0371	15.1051	0.0345	34.8886	0.0817
18/20-2z	3462	15	F5	15.2632	0.0657	15.1149	0.0631	34.8648	0.1472
18/20-2z	3462	15	F50	15.4294	0.0178	15.0352	0.0172	34.8337	0.0397
18/20-2z	3462	15	F51	15.9761	0.1342	15.1338	0.1208	37.7547	0.3254
18/20-2z	3462	15	F52	16.9605	0.0101	15.3871	0.0093	36.2775	0.0228
18/20-2z	3462	15	F53	15.1972	0.0335	15.0857	0.0244	34.7971	0.0596
18/20-2z	3462	15	F54	14.1537	0.0157	14.7123	0.013	34.125	0.0314
18/20-2z	3462	15	F55	14.8297	0.0864	14.875	0.0822	34.4071	0.1944
18/20-2z	3462	15	F56	14.9766	0.1164	14.9265	0.0666	34.7159	0.1663
18/20-2z	3462	15	F57	15.8318	0.0111	15.2297	0.01	35.1664	0.0228
18/20-2z	3462	15	F58	14.6548	0.0558	14.8135	0.0511	35.0004	0.1228
18/20-2z	3462	15	F59	14.3161	0.0325	14.8378	0.0327	34.261	0.0766
18/20-2z	3462	15	F60	14.3351	0.0434	14.8078	0.0438	34.1919	0.1019
18/20-2z	3462	15	F61	14.2187	0.0455	14.7473	0.037	33.7983	0.0874
18/20-2z	3462	15	F62	14.8506	0.0205	14.9993	0.0202	34.6611	0.0476
18/20-2z	3462	15	F63	17.2752	0.0389	15.4192	0.034	36.4825	0.0814
18/20-2z	3462	15	F64	15.8503	0.0957	15.1306	0.0915	35.6249	0.218
18/20-2z	3462	15	F7	14.6737	0.0849	14.8193	0.0842	34.3637	0.1976
18/20-2z	3462	15	F8	16.0358	0.0914	15.3285	0.0688	35.449	0.1695
18/20-2z	3462	15	F9	15.4487	0.0769	15.0352	0.0334	35.641	0.0948
18/20-4	3666.7	16	F1	15.7414	0.1482	15.3019	0.1446	35.4871	0.3358
18/20-4	3666.7	16	F10	15.7634	0.0519	15.228	0.0503	35.0743	0.1163
18/20-4	3666.7	16	F11	15.6684	0.1117	15.321	0.1101	35.795	0.2583
18/20-4	3666.7	16	F12	18.1013	0.1701	15.9604	0.1493	35.1164	0.3321
18/20-4	3666.7	16	F14	14.3224	0.053	14.8294	0.0549	34.274	0.1267
18/20-4	3666.7	16	F15	15.9142	0.0803	15.3503	0.0752	35.3977	0.1753
18/20-4	3666.7	16	F16	14.173	0.1863	14.6578	0.1927	34.1418	0.4539
18/20-4	3666.7	16	F17	14.1961	0.0621	14.7851	0.0637	34.1135	0.1478
18/20-4	3666.7	16	F18	15.9138	0.042	15.204	0.0387	35.0985	0.0902
18/20-4	3666.7	16	F2	23.3458	0.0223	17.4702	0.0164	34.5229	0.0325
18/20-4	3666.7	16	F20	15.5513	0.025	15.1523	0.0244	34.9728	0.0572
18/20-4	3666.7	16	F21	14.9792	0.036	14.9936	0.0337	34.651	0.0793
18/20-4	3666.7	16	F22	14.3352	0.0297	14.8421	0.0203	34.3941	0.0522
18/20-4	3666.7	16	F23	13.9999	0.0378	14.594	0.0393	34.0815	0.0931
18/20-4	3666.7	16	F24	14.3194	0.0246	14.6887	0.0258	33.5605	0.059
18/20-4	3666.7	16	F26	15.7708	0.076	15.3076	0.0743	35.2945	0.1733
18/20-4	3666.7	16	F29	14.7488	0.0304	14.9292	0.0305	34.5246	0.0712
18/20-4	3666.7	16	F3	13.6582	0.0521	14.6201	0.0557	33.4825	0.1287
18/20-4	3666.7	16	F31	17.1521	0.1075	15.5899	0.0948	36.0949	0.2233
18/20-4	3666.7	16	F32	16.8256	0.0556	15.3307	0.0512	36.2717	0.1224
18/20-4	3666.7	16	F33	14.1273	0.0441	14.7379	0.0467	33.8822	0.1077
18/20-4	3666.7	16	F35	15.4833	0.0485	15.1327	0.0175	34.9501	0.0462
18/20-4	3666.7	16	F38	17.0868	0.0669	15.5235	0.0611	36.6314	0.1459
18/20-4	3666.7	16	F39	14.1212	0.0147	14.6731	0.0153	35.4476	0.0369
18/20-4	3666.7	16	F40	14.3041	0.0315	14.8643	0.0321	34.3028	0.0747
18/20-4	3666.7	16	F42	14.2752	0.0404	14.9181	0.0423	34.58	0.0989
18/20-4	3666.7	16	F43	13.7065	0.0157	14.6545	0.0167	34.3383	0.04
18/20-4	3666.7	16	F44	15.2012	0.059	15.0133	0.0579	34.6757	0.1353
18/20-4	3666.7	16	F45	14.827	0.0252	14.8568	0.0212	34.7692	0.0502
18/20-4	3666.7	16	F46	14.7293	0.0391	14.9557	0.0307	34.5314	0.0716
18/20-4	3666.7	16	F47	16.3324	0.0209	15.3584	0.0192	35.2989	0.0456
18/20-4	3666.7	16	F49	15.5456	0.1516	15.3068	0.1448	35.5024	0.3455
18/20-4	3666.7	16	F50	14.4055	0.0446	14.9015	0.047	34.4914	0.1094
18/20-4	3666.7	16	F51	15.2455	0.035	15.0815	0.0345	34.8334	0.0806
18/20-4	3666.7	16	F52	18.1577	0.0343	15.4957	0.0292	37.7862	0.0723
18/20-4	3666.7	16	F53	14.324	0.05	14.7902	0.0512	34.1241	0.1188
18/20-4	3649.6	20	F1	14.8009	0.0505	14.9417	0.0512	34.5895	0.1191
18/20-4	3649.6	20	F12	14.3096	0.0223	14.849	0.0229	34.3691	0.0535
18/20-4	3649.6	20	F13	18.0099	0.0062	15.5608	0.0053	38.0277	0.0131
18/20-4	3649.6	20	F14	15.454	0.1758	15.2244	0.175	35.1698	0.4031
18/20-4	3649.6	20	F15	14.8224	0.0941	14.8403	0.0812	34.9831	0.2024
18/20-4	3649.6	20	F16	14.1359	0.0189	14.7269	0.0206	33.9061	0.0457
18/20-4	3649.6	20	F17	15.5511	0.0481	15.0532	0.0326	35.0725	0.0815
18/20-4	3649.6	20	F18	15.2263	0.054	15.1207	0.0552	35.0447	0.1206
18/20-4	3649.6	20	F19	14.8225	0.0624	14.9649	0.0664	34.5366	0.1557
18/20-4	3649.6	20	F2	14.1265	0.0073	14.8314	0.0075	34.4003	0.0173
18/20-4	3649.6	20	F21	14.2082	0.1454	14.6666	0.165	33.8255	0.3735
18/20-4	3649.6	20	F23	16.9115	0.1743	15.263	0.1232	36.2119	0.3065
18/20-4	3649.6	20	F24	15.1555	0.0855	15.0263	0.0428	34.6258	0.0986
18/20-4	3649.6	20	F25	14.8543	0.1119	15.0913	0.1136	34.8087	0.2637
18/20-4	3649.6	20	F26	16.0873	0.0173	15.3336	0.0158	35.3344	0.0367
18/20-4	3649.6	20	F27	13.7429	0.0281	14.6927	0.0295	33.4117	0.0678
18/20-4	3649.6	20	F28	14.6512	0.0314	14.8511	0.0317	35.2282	0.0756
18/20-4	3649.6	20	F29	13.942	0.0337	14.7239	0.0348	33.8021	0.0814
18/20-4	3649.6	20	F3	14.6928	0.0479	14.9611	0.0485	34.5051	0.1138
18/20-4	3649.6	20	F30	15.3505	0.0241	15.1821	0.0232	34.682	0.0531
18/20-4	3649.6	20	F31	14.7576	0.0416	15.0035	0.0409	34.9716	0.0968
18/20-4	3649.6	20	F32	15.0772	0.0619	14.9183	0.0611	36.7344	0.1519
18/20-4	3649.6	20	F33	14.3285	0.016	14.7701	0.016	34.0192	0.0372
18/20-4	3649.6	20	F34	14.3829	0.014	14.6811	0.0142	33.2134	0.0324
18/20-4	3649.6	20	F39	14.2339	0.0322	14.8458	0.0335	34.5211	0.0787
18/20-4	3649.6	20	F4	15.5656	0.065	15.1495	0.0619	34.8059	0.1431
18/20-4	3649.6	20	F41	16.3557	0.0127	15.5756	0.0118	35.4336	0.029
18/20-4	3649.6	20	F42	13.4064	0.0259	14.3957	0.0282	33.4719	0.066
18/20-4	3649.6	20	F43	15.4748	0.0373	14.9973	0.0365	35.1619	0.0852
18/20-4	3649.6	20	F44	14.7738	0.0208	14.9503	0.021	34.5308	0.0492
18/20-4	3649.6	20	F46	14.4169	0.0222	14.8675	0.023	34.3876	0.0529
18/20-4	3649.6	20	F47	14.5764	0.0327	14.8796	0.0331	34.4464	0.0775
18/20-4	3649.6	20	F48	14.5785	0.0292	14.8434	0.0277	34.2933	0.0645
18/20-4	3649.6	20	F49	13.9155	0.0134	14.6953	0.0141	34.7858	0.0338
18/20-4	3649.6	20	F5	14.9101	0.0528	14.9244	0.0507	34.9623	0.1198
18/20-4	3649.6	20	F50	15.0757	0.0692	14.9426	0.0689	34.443	0.1588
18/20-4	3649.6	20	F51	15.553	0.0133	15.1637	0.0132	37.4484	0.0328
18/20-4	3649.6	20	F54	13.6652	0.0942	14.4244	0.099	33.7211	0.2345
18/20-4	3649.6	20	F55	17.586	0.0621	15.458	0.0546	37.3202	0.1356
18/20-4	3649.6	20	F56	15.1321	0.017	15.0486	0.0077	34.7796	0.023
18/20-4	3649.6	20	F58	18.1536	0.0214	15.6204	0.0186	38.2049	0.0458
18/20-4	3649.6	20	F59	13.6268	0.0718	14.4875	0.0769	34.2046	0.1845
18/20-4	3649.6	20	F6	15.1677	0.021	15.0444	0.0212	34.7748	0.0497
18/20-4	3649.6	20	F60	14.4583	0.0842	14.9773	0.0864	34.6302	0.201
18/20-4	3649.6	20	F61	14.9575	0.0379	15.0279	0.0259	34.7482	0.062
18/20-4	3649.6	20	F63	14.7211	0.0137	14.9745	0.0138	34.5713	0.0317
18/20-4	3649.6	20	F64	14.4984	0.0247	14.864	0.0253	34.7393	0.0592
18/20-4	3649.6	20	F7	15.0047	0.0646	15.1081	0.0634	35.7758	0.1522
18/20-4	3649.6	20	F8	14.4677	0.0794	14.8562	0.0819	34.316	0.1909
18/20-4	3854.9	25	F1	15.3018	0.076	14.9466	0.0491	34.8086	0.124
18/20-4	3854.9	25	F13	15.1722	0.0425	15.0461	0.0346	34.856	0.0812
18/20-4	3854.9	25	F14	14.6082	0.0505	14.9218	0.0522	34.5812	0.1241
18/20-4	3854.9	25	F15	14.8627	0.1112	14.9935	0.1143	34.6386	0.2644
18/20-4	3854.9	25	F16	13.7862	0.0374	14.6759	0.0399	33.6843	0.0918
18/20-4	3854.9	25	F17	15.7151	0.0347	15.2006	0.0309	35.0561	0.0714
18/20-4	3854.9	25	F2	14.7528	0.1322	14.8929	0.1317	34.5198	0.3117
18/20-4	3854.9	25	F20	15.612	0.1826	15.3387	0.1788	35.4248	0.4203
18/20-4	3854.9	25	F22	15.4637	0.1153	15.0112	0.0691	35.5087	0.1912
18/20-4	3854.9	25	F23	14.2507	0.0249	14.9034	0.0258	34.4362	0.0606
18/20-4	3854.9	25	F24	14.6733	0.0081	15.0828	0.0076	35.2957	0.0181
18/20-4	3854.9	25	F26	15.2593	0.0337	15.3107	0.0337	35.5404	0.0786
18/20-4	3854.9	25	F28	14.6644	0.033	15.0899	0.0344	34.9844	0.0805
18/20-4	3854.9	25	F3	14.4259	0.067	14.8982	0.0677	34.2157	0.1589
18/20-4	3854.9	25	F31	14.5679	0.0552	14.7862	0.0267	34.0626	0.0624
18/20-4	3854.9	25	F32	14.3094	0.0883	14.7086	0.0915	34.0464	0.2135
18/20-4	3854.9	25	F33	14.1858	0.0194	14.6988	0.0198	33.1767	0.0449
18/20-4	3854.9	25	F35	17.2471	0.1784	15.3958	0.161	37.4127	0.394
18/20-4	3854.9	25	F36	14.4445	0.0076	14.9382	0.0067	34.6446	0.0164
18/20-4	3854.9	25	F37	14.5804	0.0798	14.786	0.0804	34.4028	0.1892
18/20-4	3854.9	25	F38	14.5737	0.0419	14.8631	0.0417	34.7318	0.0988
18/20-4	3854.9	25	F4	14.6226	0.1314	15.0203	0.1324	34.734	0.3135
18/20-4	3854.9	25	F40	14.1071	0.0397	14.7958	0.0417	34.1092	0.0965
18/20-4	3854.9	25	F41	15.2826	0.0325	15.1236	0.0319	34.8573	0.0743
18/20-4	3854.9	25	F43	14.3419	0.0524	14.9242	0.0544	34.0471	0.126
18/20-4	3854.9	25	F44	15.3606	0.0665	15.0951	0.066	34.2242	0.1502
18/20-4	3854.9	25	F45	15.5924	0.0228	15.1991	0.0224	35.0531	0.0517
18/20-4	3854.9	25	F46	14.3081	0.0532	14.7979	0.0504	34.02	0.119
18/20-4	3854.9	25	F47	14.4562	0.1065	14.8977	0.1095	34.291	0.2537
18/20-4	3854.9	25	F48	14.553	0.0182	14.8709	0.0182	34.5173	0.0427
18/20-4	3854.9	25	F52	14.1405	0.0172	14.7575	0.0179	34.6429	0.0421
18/20-4	3854.9	25	F53	14.1749	0.0351	14.772	0.0356	33.891	0.0827
18/20-4	3854.9	25	F53	14.7573	0.1365	15.0298	0.1384	34.7454	0.3206
18/20-4	3854.9	25	F54	15.8614	0.0982	15.18	0.0481	35.012	0.1095
18/20-4	3854.9	25	F55	15.8398	0.0378	15.253	0.031	35.3403	0.0768
18/20-4	3854.9	25	F57	15.6717	0.0234	15.1993	0.0229	35.0504	0.0528
18/20-4	3854.9	25	F57	14.5109	0.0358	14.6888	0.0304	35.7382	0.0904
18/20-4	3854.9	25	F58	14.3987	0.0413	14.872	0.0427	34.4174	0.0995
18/20-4	3854.9	25	F58	15.3033	0.0507	15.0804	0.0501	34.785	0.1161
18/20-4	3854.9	25	F59	16.6333	0.0643	15.3108	0.0445	36.2235	0.1169
18/20-4	3854.9	25	F59	15.4472	0.0368	15.142	0.0364	34.9194	0.0844
18/20-4	3854.9	25	F60	14.241	0.0207	14.8376	0.0215	34.2262	0.0501
18/20-4	3854.9	25	F60	18.0948	0.0179	15.5842	0.0153	38.0727	0.0378
18/20-4	3854.9	25	F61	15.9915	0.0951	15.3799	0.0904	35.5601	0.2119
18/20-4	3854.9	25	F61	14.6686	0.0416	14.9039	0.0419	34.3383	0.0975
18/20-4	3854.9	25	F62	15.1416	0.0193	15.0304	0.0192	34.8209	0.0447
18/20-4	3854.9	25	F62	15.5598	0.0418	15.2114	0.0409	35.0816	0.1001
18/20-4	3854.9	25	F7	14.6732	0.0091	15.0031	0.0091	34.1345	0.0208
18/20-4	3854.9	25	F8	15.3009	0.0963	15.108	0.0908	34.9567	0.2112
18/20-4	3854.9	25	F9	15.6265	0.1329	15.0911	0.128	34.8056	0.3002
18/25-3	3470.4	32	F1	14.3312	0.0414	14.8223	0.0435	34.0499	0.0999
18/25-3	3470.4	32	F10	16.0036	0.033	15.2641	0.0311	35.2657	0.072
18/25-3	3470.4	32	F11	14.602	0.1157	15.086	0.1198	35.0166	0.2849
18/25-3	3470.4	32	F14	15.7311	0.0376	15.2422	0.0369	35.1238	0.0858
18/25-3	3470.4	32	F15	14.2365	0.0333	14.8275	0.0328	34.3285	0.0771
18/25-3	3470.4	32	F16	14.3556	0.0317	14.8276	0.0305	34.207	0.0712
18/25-3	3470.4	32	F19	15.8786	0.0232	15.2734	0.0189	35.4527	0.0676
18/25-3	3470.4	32	F2	14.5361	0.0455	14.8817	0.0403	34.3298	0.0935
18/25-3	3470.4	32	F20	15.6566	0.035	15.2461	0.0331	35.1482	0.077
18/25-3	3470.4	32	F21	15.9581	0.069	15.3422	0.0567	35.3507	0.1321
18/25-3	3470.4	32	F25	18.5165	0.052	15.6487	0.0444	37.8428	0.1076
18/25-3	3470.4	32	F28	15.7304	0.0375	15.1941	0.0353	35.0564	0.0821
18/25-3	3470.4	32	F29	15.8053	0.0177	15.2721	0.0171	35.2363	0.0403
18/25-3	3470.4	32	F3	18.9419	0.0984	15.549	0.0795	38.5287	0.2041
18/25-3	3470.4	32	F30	13.9038	0.0902	14.5955	0.0952	33.9771	0.2218
18/25-3	3470.4	32	F33	16.0676	0.1753	15.2067	0.0292	34.8726	0.0552
18/25-3	3470.4	32	F35	13.661	0.0112	14.5158	0.0119	39.8713	0.0336
18/25-3	3470.4	32	F38	16.1981	0.0285	15.2884	0.0248	35.3689	0.0582
18/25-3	3470.4	32	F39	13.9724	0.0095	14.7432	0.0102	34.202	0.0236
18/25-3	3470.4	32	F40	14.6189	0.0334	14.9069	0.0351	34.463	0.082
18/25-3	3470.4	32	F41	14.6136	0.0379	14.9977	0.0391	34.8344	0.0914
18/25-3	3470.4	32	F42	14.7257	0.0664	14.9402	0.0606	34.6201	0.1442
18/25-3	3470.4	32	F43	15.741	0.0575	15.2492	0.0565	35.155	0.1306
18/25-3	3470.4	32	F44	15.8016	0.0177	15.2286	0.0173	35.163	0.04
18/25-3	3470.4	32	F47	15.3121	0.0106	15.1283	0.0105	34.8884	0.0247
18/25-3	3470.4	32	F48	13.9257	0.0427	14.6368	0.0445	33.7446	0.1046
18/25-3	3470.4	32	F49	15.6718	0.0576	15.1662	0.047	34.9595	0.1083
18/25-3	3470.4	32	F5	19.1282	0.0934	16.2766	0.0232	34.2127	0.0394
18/25-3	3470.4	32	F50	15.3959	0.0791	15.1674	0.078	35.3215	0.1838
18/25-3	3470.4	32	F53	14.5876	0.0369	14.8755	0.0329	34.438	0.0775
18/25-3	3470.4	32	F55	15.2549	0.0318	15.1221	0.0319	34.865	0.0734
18/25-3	3470.4	32	F56	14.2851	0.0862	14.8616	0.09	34.2976	0.2048
18/25-3	3470.4	32	F57	14.2271	0.0805	14.8994	0.0851	34.6111	0.1994
18/25-3	3470.4	32	F58	15.514	0.0219	15.1294	0.0176	35.0321	0.0419
18/25-3	3470.4	32	F59	15.8045	0.0171	15.2534	0.0162	35.1771	0.0383
18/25-3	3470.4	32	F6	15.5561	0.0333	15.1588	0.029	34.9534	0.0667
18/25-3	3470.4	32	F60	16.485	0.0208	15.4114	0.0167	35.3843	0.0384
18/25-3	3470.4	32	F61	16.4583	0.0774	15.3342	0.0664	35.6387	0.1563
18/25-3	3470.4	32	F7	14.6192	0.026	14.8806	0.0249	34.3573	0.0582
18/25-3	3470.4	32	F8	15.5857	0.0242	15.1682	0.0207	34.9998	0.0489
18/25-3	3470.4	32	F9	15.2199	0.0778	15.1887	0.0791	35.107	0.1836
18/25-3	3459.5	35	F1	15.9367	0.0231	15.2877	0.0192	35.2554	0.0454
18/25-3	3459.5	35	F12	15.6005	0.0128	15.1905	0.011	35.0283	0.0249
18/25-3	3459.5	35	F13	15.8981	0.0225	15.2943	0.0213	35.3423	0.0497
18/25-3	3459.5	35	F15	15.8997	0.0412	15.2093	0.0317	35.0993	0.074
18/25-3	3459.5	35	F16	14.4529	0.0294	14.8496	0.0302	34.2635	0.0698
18/25-3	3459.5	35	F17	16.7954	0.1785	15.1586	0.1394	35.4072	0.3333
18/25-3	3459.5	35	F18	14.7712	0.0454	14.9735	0.0455	34.5982	0.1062
18/25-3	3459.5	35	F19	15.7549	0.0115	15.2468	0.0109	35.1541	0.0274
18/25-3	3459.5	35	F2	15.8704	0.0205	15.2801	0.0194	35.264	0.0454
18/25-3	3459.5	35	F20	15.7554	0.0116	15.2469	0.011	35.1535	0.0274
18/25-3	3459.5	35	F22	14.472	0.1702	15.0291	0.1324	34.8384	0.3084
18/25-3	3459.5	35	F23	15.6085	0.0394	15.2146	0.0379	35.1513	0.0882
18/25-3	3459.5	35	F24	15.9467	0.0149	15.2781	0.0126	35.2695	0.0302
18/25-3	3459.5	35	F25	16.7533	0.0754	15.324	0.05	35.6387	0.1173
18/25-3	3459.5	35	F26	15.9428	0.0177	15.2837	0.017	35.2248	0.0396
18/25-3	3459.5	35	F27	15.7864	0.017	15.2175	0.0117	35.0755	0.0271
18/25-3	3459.5	35	F28	15.462	0.0111	15.1479	0.0105	34.9397	0.0246
18/25-3	3459.5	35	F3	15.7275	0.0204	15.241	0.0199	35.1067	0.0458
18/25-3	3459.5	35	F30	14.8676	0.0742	14.9449	0.0679	34.5445	0.1611
18/25-3	3459.5	35	F31	15.0181	0.0696	14.9168	0.0607	34.49	0.1417
18/25-3	3459.5	35	F32	14.8227	0.0639	14.9269	0.0469	34.7346	0.1195
18/25-3	3459.5	35	F33	14.7489	0.0258	14.8971	0.0227	34.4522	0.0537
18/25-3	3459.5	35	F34	14.366	0.0854	14.8237	0.0899	34.2549	0.2072
18/25-3	3459.5	35	F35	15.7223	0.0413	15.206	0.0353	35.1534	0.0837
18/25-3	3459.5	35	F36	15.7803	0.0545	15.1916	0.0456	35.2359	0.1094
18/25-3	3459.5	35	F37	15.2956	0.0544	15.006	0.0134	34.7332	0.0325
18/25-3	3459.5	35	F38	15.5989	0.0096	15.2044	0.0084	35.0457	0.0197
18/25-3	3459.5	35	F39	15.8289	0.0615	15.1659	0.0442	34.9607	0.103
18/25-3	3459.5	35	F4	15.8247	0.0315	15.2267	0.0301	35.1954	0.0705
18/25-3	3459.5	35	F40	14.7873	0.0514	14.8667	0.0438	34.3661	0.1052
18/25-3	3459.5	35	F41	15.7333	0.0052	15.2273	0.005	35.1274	0.0118
18/25-3	3459.5	35	F42	15.9721	0.0071	15.3125	0.0066	35.3067	0.0153
18/25-3	3459.5	35	F43	14.2085	0.0483	14.7451	0.0284	33.9871	0.0673
18/25-3	3459.5	35	F45	14.3442	0.0436	14.834	0.041	34.2345	0.0963
18/25-3	3459.5	35	F47	14.3498	0.0776	14.8171	0.0471	34.1724	0.1255
18/25-3	3459.5	35	F48	14.63	0.0113	14.9229	0.011	34.469	0.0251
18/25-3	3459.5	35	F49	15.7877	0.0252	15.269	0.0211	35.2087	0.0499
18/25-3	3459.5	35	F5	15.7446	0.0429	15.1736	0.0408	35.0065	0.095
18/25-3	3459.5	35	F55	14.3399	0.0341	14.7989	0.0336	34.2718	0.0791
18/25-3	3459.5	35	F56	14.9473	0.0593	14.98	0.0581	34.4977	0.1353
18/25-3	3459.5	35	F57	16.3571	0.0205	15.3862	0.014	37.5247	0.037
18/25-3	3459.5	35	F58	15.9234	0.0097	15.2643	0.0071	35.1866	0.0159
18/25-3	3459.5	35	F59	14.8831	0.0059	15.0033	0.0055	34.6201	0.0128
18/25-3	3459.5	35	F6	15.9828	0.0145	15.2966	0.0064	35.3208	0.0155
18/25-3	3459.5	35	F60	15.4429	0.0112	15.1369	0.0085	34.9872	0.0201
18/25-3	3459.5	35	F61	15.5276	0.0338	15.1753	0.03	35.0273	0.0698
18/25-3	3459.5	35	F62	15.4099	0.0964	15.1887	0.095	35.1026	0.221
18/25-3	3459.5	35	F7	15.7545	0.0059	15.2292	0.0044	35.1039	0.0103
18/25-3	3459.5	35	F8	14.2504	0.0198	14.8518	0.0183	35.1104	0.043
18/25-3	3459.5	35	F9	14.2013	0.024	14.7296	0.008	33.9422	0.0204
18/25-3	3571	40	F1	15.8835	0.062	15.3576	0.0591	35.3445	0.1371
18/25-3	3571	40	F10	14.4619	0.0292	14.8374	0.0186	34.2971	0.0488
18/25-3	3571	40	F12	14.6512	0.0947	14.7564	0.0794	35.2987	0.2024
18/25-3	3571	40	F14	14.5819	0.0422	14.954	0.0377	34.6134	0.0892
18/25-3	3571	40	F15	14.4596	0.0436	14.8585	0.0407	34.3474	0.0944
18/25-3	3571	40	F16	15.7747	0.0778	15.3307	0.0746	35.34	0.1738
18/25-3	3571	40	F17	15.7252	0.0343	15.1462	0.0239	35.0168	0.0548
18/25-3	3571	40	F18	14.5174	0.0461	14.8441	0.0461	34.305	0.1083
18/25-3	3571	40	F20	14.3158	0.0209	14.8481	0.0206	34.2116	0.0487
18/25-3	3571	40	F21	14.6607	0.0376	14.8869	0.0306	34.3817	0.0712
18/25-3	3571	40	F22	15.3498	0.1082	15.1436	0.1052	34.9402	0.2471
18/25-3	3571	40	F23	14.5187	0.017	14.9041	0.0173	34.4665	0.0402
18/25-3	3571	40	F24	14.5798	0.0188	14.9391	0.0182	34.5753	0.0437
18/25-3	3571	40	F26	16.7486	0.0383	15.4301	0.0317	38.2898	0.0803
18/25-3	3571	40	F27	14.5385	0.0284	14.9047	0.0287	34.3183	0.0672
18/25-3	3571	40	F28	15.5583	0.023	15.0489	0.0219	35.943	0.0525
18/25-3	3571	40	F29	15.4549	0.102	15.1141	0.0924	35.3554	0.2325
18/25-3	3571	40	F33	14.4262	0.0368	14.9059	0.0384	34.4859	0.0886
18/25-3	3571	40	F34	14.4203	0.0869	14.8603	0.0864	35.3478	0.2171
18/25-3	3571	40	F35	14.9362	0.0706	15.0337	0.065	34.9399	0.1543
18/25-3	3571	40	F36	14.8866	0.1528	14.8436	0.1433	34.7157	0.345
18/25-3	3571	40	F37	15.5601	0.0141	15.1971	0.0122	35.0699	0.0286
18/25-3	3571	40	F4	15.5825	0.0298	15.0441	0.0289	35.4668	0.0677
18/25-3	3571	40	F40	13.8571	0.015	14.6878	0.0155	34.0005	0.0364
18/25-3	3571	40	F41	13.9684	0.0197	14.6891	0.0208	35.6913	0.0516
18/25-3	3571	40	F42	15.7919	0.0605	15.2602	0.0485	35.2941	0.1167
18/25-3	3571	40	F43	14.4403	0.088	14.8338	0.0902	34.2725	0.2099
18/25-3	3571	40	F44	14.51	0.0216	14.8752	0.0209	34.421	0.0476
18/25-3	3571	40	F45	15.4649	0.0739	15.0647	0.0686	34.71	0.1591
18/25-3	3571	40	F46	15.3855	0.1412	15.1798	0.1281	35.455	0.3017
18/25-3	3571	40	F47	16.2313	0.1352	15.1766	0.0867	35.9207	0.2284
18/25-3	3571	40	F48	16.3695	0.0842	15.2975	0.0547	35.7804	0.134
18/25-3	3571	40	F49	15.6473	0.1191	15.2138	0.1184	35.1783	0.2758
18/25-3	3571	40	F5	17.7005	0.1728	15.4672	0.0913	36.6152	0.2226
18/25-3	3571	40	F50	15.6794	0.0996	15.2781	0.0782	35.4928	0.1918
18/25-3	3571	40	F51	15.2977	0.0595	15.1079	0.0544	35.0344	0.1297
18/25-3	3571	40	F52	14.8559	0.01	14.9606	0.0068	34.4218	0.0182
18/25-3	3571	40	F53	15.8683	0.1184	15.4109	0.1147	35.2479	0.2654
18/25-3	3571	40	F54	16.7635	0.1129	15.1632	0.1009	36.0901	0.2433
18/25-3	3571	40	F55	14.5811	0.044	14.9155	0.0433	34.5914	0.1029
18/25-3	3571	40	F56	14.9621	0.0349	15.0066	0.0295	34.5551	0.068
18/25-3	3571	40	F57	14.8332	0.1252	15.0167	0.1264	34.9086	0.2993
18/25-3	3571	40	F58	21.7867	0.0158	16.9283	0.0119	34.6842	0.025
18/25-3	3571	40	F59	14.3567	0.1232	14.8199	0.1022	34.5502	0.2552
18/25-3	3571	40	F6	15.6574	0.0278	15.2344	0.0243	35.153	0.0579
18/25-3	3571	40	F61	15.0756	0.1924	14.7909	0.0416	35.0752	0.191
18/25-3	3571	40	F62	14.3206	0.0366	14.8614	0.0377	34.4033	0.088
18/25-3	3571	40	F8	15.6885	0.0277	15.2494	0.0264	35.2042	0.0615
18/25-3	3571	40	F9	14.3012	0.0542	14.768	0.0549	34.1456	0.1289
27/5-1	1097	1	F12	16.0778	0.0308	15.1055	0.0268	35.3815	0.0639
27/5-1	1097	1	F14	14.0081	0.0412	14.574	0.0429	34.9131	0.1041
27/5-1	1097	1	F15	14.5577	0.0131	14.761	0.0135	34.8573	0.0317
27/5-1	1097	1	F16	14.9947	0.0526	14.9643	0.0508	34.5383	0.1197
27/5-1	1097	1	F17	15.8799	0.0377	15.1801	0.0365	34.9349	0.0848
27/5-1	1097	1	F19	13.3365	0.0177	14.4188	0.0174	33.4536	0.0413
27/5-1	1097	1	F2	15.068	0.042	14.926	0.0419	34.4934	0.0977
27/5-1	1097	1	F20	15.474	0.0286	15.0182	0.0257	34.6667	0.0592
27/5-1	1097	1	F22	15.6929	0.0193	15.2219	0.0187	35.0777	0.0436
27/5-1	1097	1	F23	15.9878	0.0258	15.2154	0.0248	35.5077	0.0583
27/5-1	1097	1	F24	15.2399	0.0563	14.9941	0.0562	34.6945	0.1305
27/5-1	1097	1	F28	13.7281	0.0614	14.5111	0.0644	35.8495	0.1639
27/5-1	1097	1	F3	13.4595	0.0212	14.4273	0.0183	33.3199	0.0442
27/5-1	1097	1	F31	20.4124	0.1197	16.3873	0.0623	35.9526	0.1371
27/5-1	1097	1	F32	18.1574	0.0795	15.9942	0.0698	38.3547	0.1691
27/5-1	1097	1	F38	14.3523	0.04	14.7831	0.0409	34.3833	0.0966
27/5-1	1097	1	F40	15.5807	0.0358	15.1237	0.0349	34.895	0.0816
27/5-1	1097	1	F42	14.3529	0.0344	14.767	0.0349	34.2073	0.0808
27/5-1	1097	1	F45	14.1002	0.0532	14.5472	0.0554	33.8789	0.1299
27/5-1	1097	1	F46	14.1914	0.0696	14.6714	0.0714	35.684	0.1758
27/5-1	1097	1	F5	15.1384	0.0234	15.0456	0.0236	34.716	0.0545
27/5-1	1097	1	F51	14.9518	0.0511	15.0175	0.052	34.7255	0.1223
27/5-1	1097	1	F53	15.1162	0.0228	15.0421	0.0221	34.7302	0.052
27/5-1	1097	1	F54	14.6297	0.0498	14.8669	0.0462	34.4518	0.1104
27/5-1	1097	1	F60	15.5271	0.0655	15.0905	0.0624	34.8517	0.1466
27/5-1	1097	1	F61	14.6375	0.0599	14.86	0.0609	34.7097	0.1441
27/5-1	1097	1	F7	14.1101	0.0151	14.7768	0.0159	34.5906	0.0374
27/5-1	1097	1	F8	14.9208	0.0273	14.9479	0.0275	34.4989	0.065
27/5-1	1096.6	2	F10	14.6461	0.0591	14.8322	0.0503	34.3089	0.1193
27/5-1	1096.6	2	F11	16.3895	0.0895	15.2954	0.0792	36.5426	0.3838
27/5-1	1096.6	2	F13	13.5265	0.0323	14.5145	0.0346	39.3892	0.0944
27/5-1	1096.6	2	F14	14.0504	0.0774	14.7434	0.0812	34.119	0.1896
27/5-1	1096.6	2	F17	14.1236	0.0884	14.7688	0.0929	34.2089	0.2168
27/5-1	1096.6	2	F18	14.7198	0.1821	14.6994	0.1717	34.1148	0.4049
27/5-1	1096.6	2	F20	18.1999	0.0138	15.5624	0.0121	37.8996	0.0293
27/5-1	1096.6	2	F21	15.5278	0.0295	15.1411	0.0267	34.9615	0.0622
27/5-1	1096.6	2	F22	14.2354	0.0508	14.8726	0.0479	34.3978	0.1165
27/5-1	1096.6	2	F23	14.8352	0.0217	14.9079	0.0216	35.0767	0.0516
27/5-1	1096.6	2	F24	14.5332	0.0139	14.9293	0.0145	34.6875	0.0334
27/5-1	1096.6	2	F26	15.2451	0.0636	15.0217	0.063	34.8233	0.1484
27/5-1	1096.6	2	F27	14.3685	0.0501	14.819	0.052	34.2082	0.1204
27/5-1	1096.6	2	F28	14.5718	0.0854	14.959	0.0858	34.6421	0.2001
27/5-1	1096.6	2	F29	13.9578	0.085	14.7978	0.0852	34.2185	0.2042
27/5-1	1096.6	2	F30	13.9066	0.0955	14.7591	0.1014	33.6806	0.2332
27/5-1	1096.6	2	F33	14.5733	0.0087	14.9251	0.009	34.4263	0.0209
27/5-1	1096.6	2	F34	15.7784	0.0665	15.2808	0.0652	35.3683	0.1513
27/5-1	1096.6	2	F35	15.4408	0.0462	15.1808	0.0453	35.3114	0.1235
27/5-1	1096.6	2	F38	14.1489	0.0171	14.8183	0.0176	34.1851	0.0415
27/5-1	1096.6	2	F4	19.0819	0.0896	15.4937	0.0725	37.2354	0.1747
27/5-1	1096.6	2	F42	16.713	0.025	15.411	0.0218	35.4293	0.0513
27/5-1	1096.6	2	F43	14.3924	0.0229	14.8676	0.0209	34.3667	0.049
27/5-1	1096.6	2	F46	17.2757	0.1018	15.4178	0.0896	37.5412	0.2224
27/5-1	1096.6	2	F48	14.5885	0.1532	14.9085	0.1556	34.5014	0.3658
27/5-1	1096.6	2	F49	15.4615	0.0682	15.1414	0.0661	35.0332	0.154
27/5-1	1096.6	2	F5	14.5241	0.0472	14.9293	0.0487	34.7588	0.1145
27/5-1	1096.6	2	F51	14.552	0.028	14.9173	0.0228	34.7421	0.0529
27/5-1	1096.6	2	F53	13.5288	0.0334	14.5331	0.0294	33.3829	0.071
27/5-1	1096.6	2	F54	16.0191	0.0904	15.0864	0.0649	34.9612	0.1534
27/5-1	1096.6	2	F56	14.812	0.0231	14.9473	0.0239	35.2465	0.0564
27/5-1	1096.6	2	F57	15.8611	0.0996	14.963	0.0948	36.0523	0.2301
27/5-1	1096.6	2	F6	14.141	0.0468	14.8301	0.0484	34.0141	0.1132
27/5-1	1096.6	2	F60	16.1873	0.1079	15.2295	0.1007	35.4466	0.2371
27/5-1	1096.6	2	F61	15.8725	0.0706	15.1963	0.0685	34.9375	0.1584
27/5-1	1096.6	2	F9	14.7083	0.0353	14.8271	0.0347	33.4918	0.0802
27/5-1	1095.75	3	F1	16.4103	0.0794	15.163	0.0695	35.0219	0.1633
27/5-1	1095.75	3	F12	14.8722	0.0651	14.7546	0.0396	35.4168	0.1403
27/5-1	1095.75	3	F13	15.601	0.0469	15.1583	0.0459	35.0352	0.1078
27/5-1	1095.75	3	F14	14.1264	0.0278	14.6362	0.0287	34.6284	0.0686
27/5-1	1095.75	3	F15	16.4104	0.1633	15.2377	0.1163	35.8492	0.2927
27/5-1	1095.75	3	F16	14.4379	0.0196	14.8791	0.0203	34.2977	0.0471
27/5-1	1095.75	3	F17	16.1227	0.0473	15.269	0.0449	36.8482	0.109
27/5-1	1095.75	3	F19	15.5438	0.0391	15.1464	0.0361	35.0291	0.0858
27/5-1	1095.75	3	F2	14.0838	0.0192	14.795	0.0201	34.0377	0.0468
27/5-1	1095.75	3	F20	14.1846	0.1047	14.8831	0.111	34.2922	0.2573
27/5-1	1095.75	3	F21	14.9474	0.1781	14.8294	0.1758	34.5005	0.4135
27/5-1	1095.75	3	F22	14.5616	0.1013	14.9105	0.0951	34.8116	0.2286
27/5-1	1095.75	3	F23	16.0289	0.1422	15.3092	0.1117	35.0413	0.2653
27/5-1	1095.75	3	F25	14.9601	0.0648	15.0353	0.0654	34.7309	0.1529
27/5-1	1095.75	3	F26	13.7186	0.1187	14.4666	0.1267	34.3846	0.3043
27/5-1	1095.75	3	F28	13.7601	0.0234	14.6645	0.0252	33.699	0.0585
27/5-1	1095.75	3	F29	14.2943	0.0357	14.8557	0.0377	34.3498	0.0869
27/5-1	1095.75	3	F30	13.3922	0.0303	14.444	0.0331	34.5068	0.0792
27/5-1	1095.75	3	F31	15.5712	0.0319	15.282	0.0308	34.9848	0.0717
27/5-1	1095.75	3	F32	14.6277	0.0409	14.9509	0.0416	34.5591	0.0984
27/5-1	1095.75	3	F33	14.062	0.0612	14.76	0.0648	33.933	0.1506
27/5-1	1095.75	3	F34	15.4417	0.0389	15.1386	0.038	34.9243	0.0893
27/5-1	1095.75	3	F35	14.7096	0.0522	14.9524	0.0528	34.5361	0.123
27/5-1	1095.75	3	F36	14.5018	0.0351	14.9255	0.036	34.4809	0.0842
27/5-1	1095.75	3	F37	15.6815	0.078	15.0959	0.0435	35.0058	0.1146
27/5-1	1095.75	3	F39	14.2974	0.0502	14.7068	0.0417	36.5803	0.104
27/5-1	1095.75	3	F4	15.6656	0.0413	15.2502	0.0411	35.2331	0.0953
27/5-1	1095.75	3	F41	14.4454	0.0465	14.8651	0.0472	34.3937	0.1117
27/5-1	1095.75	3	F42	13.7072	0.091	14.6137	0.0986	33.9869	0.2317
27/5-1	1095.75	3	F43	16.9704	0.18	15.3108	0.1324	37.0656	0.3367
27/5-1	1095.75	3	F44	17.8401	0.0121	15.4955	0.0106	37.4086	0.026
27/5-1	1095.75	3	F45	15.4705	0.0774	15.1182	0.0753	34.9341	0.1764
27/5-1	1095.75	3	F46	14.109	0.0227	14.8152	0.023	34.5097	0.0563
27/5-1	1095.75	3	F47	14.4357	0.0278	14.9125	0.0285	34.5597	0.0672
27/5-1	1095.75	3	F48	15.0313	0.0358	15.0403	0.0348	34.7198	0.0813
27/5-1	1095.75	3	F5	14.1826	0.0985	14.58	0.103	33.8828	0.2415
27/5-1	1095.75	3	F50	14.276	0.0148	14.8558	0.0151	34.2587	0.0354
27/5-1	1095.75	3	F51	15.3957	0.0358	15.0069	0.0349	35.0276	0.0825
27/5-1	1095.75	3	F52	17.6231	0.0641	15.5858	0.0566	39.2891	0.1435
27/5-1	1095.75	3	F53	14.3349	0.0404	14.7149	0.0414	39.248	0.1118
27/5-1	1095.75	3	F55	14.4043	0.0864	14.9246	0.0913	34.3634	0.2103
27/5-1	1095.75	3	F57	15.8751	0.072	15.2274	0.0685	35.1818	0.1603
27/5-1	1095.75	3	F59	14.5772	0.0304	14.8728	0.0312	34.7582	0.0738
27/5-1	1087.5	7	F12	17.1624	0.0201	15.5516	0.0181	36.7422	0.0432
27/5-1	1087.5	7	F15	15.8808	0.0981	15.1973	0.0883	35.2905	0.2081
27/5-1	1087.5	7	F16	14.6154	0.0362	14.9393	0.0368	34.5122	0.0863
27/5-1	1087.5	7	F2	13.4528	0.0473	14.4532	0.0516	33.5121	0.1213
27/5-1	1087.5	7	F21	14.2407	0.0724	14.805	0.0756	34.1389	0.1767
27/5-1	1087.5	7	F22	14.5898	0.0956	14.8574	0.098	34.3648	0.2292
27/5-1	1087.5	7	F23	14.6389	0.0502	14.7925	0.0475	35.3984	0.1162
27/5-1	1087.5	7	F24	14.6674	0.0676	14.9503	0.0683	34.4064	0.1603
27/5-1	1087.5	7	F25	14.5312	0.065	14.941	0.0673	34.2279	0.1571
27/5-1	1087.5	7	F29	14.6887	0.0609	15.0173	0.062	34.7777	0.1461
27/5-1	1087.5	7	F31	15.6979	0.0252	15.2587	0.0244	35.1841	0.0573
27/5-1	1087.5	7	F32	15.4188	0.0568	15.0106	0.0553	35.7034	0.1331
27/5-1	1087.5	7	F36	18.2066	0.1316	15.6564	0.0779	37.1534	0.1901
27/5-1	1087.5	7	F40	16.0516	0.0514	15.3569	0.0502	35.5026	0.117
27/5-1	1087.5	7	F52	14.4552	0.0719	14.9197	0.0743	34.4025	0.1725
27/5-1	1087.5	7	F55	14.4506	0.0472	14.8731	0.0426	34.6039	0.1043
27/5-1	1087.5	7	F59	15.3258	0.1052	14.8731	0.1034	34.7488	0.2443
27/5-1	1087.5	7	F6	13.7517	0.0918	14.6931	0.0982	33.9747	0.2323
27/5-1	1087.5	7	F61	14.2991	0.0959	14.9341	0.1	34.5271	0.2341
27/5-1	1087.5	7	F62	17.4151	0.1411	15.2857	0.104	37.7549	0.2643
27/5-1	1086.85	8	F1	15.9639	0.0284	15.2568	0.0259	35.3018	0.0621
27/5-1	1086.85	8	F11	14.6299	0.0418	14.8277	0.0429	34.1125	0.0994
27/5-1	1086.85	8	F12	15.4672	0.099	14.983	0.0941	34.6487	0.2205
27/5-1	1086.85	8	F14	15.3627	0.085	14.8709	0.0828	35.9972	0.2022
27/5-1	1086.85	8	F18	14.0102	0.0675	14.5767	0.0564	33.987	0.1359
27/5-1	1086.85	8	F19	15.3579	0.0686	15.0959	0.0684	35.3351	0.1606
27/5-1	1086.85	8	F28	16.2679	0.023	15.3534	0.0217	35.3206	0.0507
27/5-1	1086.85	8	F29	15.4452	0.1208	15.1553	0.0935	35.369	0.2307
27/5-1	1086.85	8	F30	14.6462	0.0389	14.9075	0.0376	34.3866	0.0874
27/5-1	1086.85	8	F31	20.9418	0.0869	15.7	0.0435	40.1871	0.182
27/5-1	1086.85	8	F32	17.1644	0.048	15.469	0.0301	35.6154	0.0693
27/5-1	1086.85	8	F34	16.8831	0.0819	15.3777	0.0233	37.3094	0.1508
27/5-1	1086.85	8	F35	14.2084	0.0472	14.7562	0.05	33.9216	0.1144
27/5-1	1086.85	8	F36	14.5978	0.108	14.9151	0.1086	34.5661	0.2546
27/5-1	1086.85	8	F37	15.3813	0.125	15.0594	0.1204	34.8972	0.2831
27/5-1	1086.85	8	F39	14.8568	0.1092	14.8586	0.1109	34.3329	0.2571
27/5-1	1086.85	8	F40	14.8072	0.0923	15.0046	0.0898	34.9555	0.2143
27/5-1	1086.85	8	F41	15.228	0.1521	14.9249	0.1508	36.0137	0.3662
27/5-1	1086.85	8	F43	14.0238	0.1305	14.6354	0.1364	33.8544	0.3209
27/5-1	1086.85	8	F44	15.0342	0.0562	15.081	0.057	34.8376	0.1335
27/5-1	1086.85	8	F45	14.5241	0.179	14.7961	0.1723	34.3339	0.4125
27/5-1	1086.85	8	F5	14.6221	0.0173	14.9201	0.0179	34.5038	0.0409
27/5-1	1086.85	8	F53	14.5558	0.0317	14.8371	0.0329	34.1075	0.0764
27/5-1	1086.85	8	F54	15.6225	0.1033	15.1518	0.0938	35.1323	0.2244
27/5-1	1086.85	8	F55	14.3282	0.0354	14.8631	0.0367	34.4097	0.0856
27/5-1	1086.85	8	F59	14.9981	0.0552	14.9421	0.055	34.493	0.1275
27/5-1	1079.45	12	F1	14.9088	0.0284	14.9165	0.0286	34.4729	0.0675
27/5-1	1079.45	12	F10	15.8965	0.0371	15.1725	0.0356	35.0976	0.0813
27/5-1	1079.45	12	F15	13.9558	0.0323	14.6886	0.034	33.9567	0.0795
27/5-1	1079.45	12	F25	14.8424	0.0643	14.9207	0.0646	34.4387	0.1498
27/5-1	1079.45	12	F27	14.8007	0.0551	14.9486	0.0551	34.6633	0.13
27/5-1	1079.45	12	F29	14.2523	0.0369	14.7083	0.0387	34.5096	0.0919
27/5-1	1079.45	12	F34	18.3137	0.0696	15.3664	0.0579	37.9095	0.1451
27/5-1	1079.45	12	F35	14.7301	0.0429	14.9783	0.039	34.665	0.0928
27/5-1	1079.45	12	F36	18.2736	0.047	15.5612	0.0407	37.6141	0.098
27/5-1	1079.45	12	F37	14.415	0.0528	14.8657	0.0553	35.5622	0.1332
27/5-1	1079.45	12	F38	15.7343	0.0379	15.1811	0.0285	35.1246	0.0718
27/5-1	1079.45	12	F40	15.2711	0.0679	15.089	0.0263	35.7098	0.0885
27/5-1	1079.45	12	F41	15.5782	0.0383	15.1875	0.0377	35.01	0.087
27/5-1	1079.45	12	F44	14.4026	0.0554	14.8049	0.0463	34.2294	0.1113
27/5-1	1079.45	12	F46	15.5279	0.0172	15.1641	0.0171	34.9869	0.0395
27/5-1	1079.45	12	F47	16.2764	0.0553	15.2177	0.0409	35.7035	0.1009
27/5-1	1079.45	12	F53	15.9374	0.0395	15.2407	0.0126	35.449	0.0514
27/5-1	1079.45	12	F54	15.9618	0.0256	15.2993	0.0229	35.3765	0.0541
27/5-1	1079.45	12	F55	15.8106	0.009	15.252	0.0085	35.1692	0.0198
27/5-1	1079.45	12	F56	15.4591	0.0154	15.1673	0.0152	34.9839	0.0352
27/5-1	1079.45	12	F57	15.1775	0.0372	15.0446	0.037	34.7827	0.0865
27/5-1	1079.45	12	F58	15.7302	0.0153	15.2251	0.015	35.1353	0.0348
27/5-1	1079.45	12	F6	18.2701	0.0644	15.4801	0.0516	37.465	0.1263
27/5-1	1075.4	14	F15	15.4767	0.0518	15.1338	0.0515	34.945	0.1192
27/5-1	1075.4	14	F16	14.2838	0.0419	14.7952	0.0426	34.1194	0.1011
27/5-1	1075.4	14	F22	15.7767	0.0199	15.2159	0.0193	35.1336	0.0448
27/5-1	1075.4	14	F31	14.504	0.0265	14.8549	0.0266	34.542	0.0621
27/5-1	1075.4	14	F40	15.007	0.0419	14.9674	0.0416	34.5249	0.1395
27/5-1	1075.4	14	F49	15.4542	0.0899	15.095	0.0441	35.0977	0.1284
27/5-1	1075.4	14	F51	14.1939	0.0144	14.7807	0.0147	34.4573	0.0352
27/5-1	1075.4	14	F52	14.9088	0.0152	14.9784	0.0142	34.774	0.0332
27/5-1	1075.4	14	F53	15.4748	0.0403	15.1519	0.0398	34.9568	0.0919
27/5-1	1075.4	14	F55	14.2134	0.0159	14.7635	0.0165	34.0498	0.0386
27/5-1	1075.4	14	F58	14.4491	0.0304	14.7987	0.0265	34.0516	0.0619
27/5-1	1075.4	14	F59	16.3361	0.0306	14.9688	0.0268	36.7823	0.0669
